# Supplementary material for: Understanding of Immune Escape Mechanisms and Advances in Cancer Immunotherapy
Source: Hindawi journal article supplement (doi:10.1155/2022/8901326), 2022-03-31
Supplement: f1 [file 8901326.f1.pdf]

**Table S1.** Clinical trials of combined application of CTLA4 antibody and PD-1 antibody.

| <b>NCT identifier</b> | <b>Brief title</b>                                                                                           | <b>Disease condition</b>                          | <b>Therapeutic interventions</b>                                         | <b>Phase</b> | <b>Status as of March 2020</b> |
|-----------------------|--------------------------------------------------------------------------------------------------------------|---------------------------------------------------|--------------------------------------------------------------------------|--------------|--------------------------------|
| NCT02917772           | Tailored immunotherapy approach with nivolumab in subjects with metastatic or advanced renal cell carcinoma. | Metastatic or advanced renal cell carcinoma       | Nivolumab plus Ipilimumab                                                | II           | Active, not recruiting         |
| NCT02939300           | Ipilimumab and nivolumab in leptomeningeal metastases.                                                       | Leptomeningeal metastases                         | Nivolumab plus Ipilimumab                                                | II           | Active, not recruiting         |
| NCT03241186           | Ipilimumab and nivolumab as adjuvant treatment of mucosal melanoma.                                          | Mucosal melanoma                                  | Nivolumab plus Ipilimumab                                                | II           | Recruiting                     |
| NCT03297593           | Nivolumab, combination with ipilimumab in patients with metastatic renal cell carcinoma.                     | Renal cell carcinoma                              | Nivolumab plus Ipilimumab                                                | II           | Recruiting                     |
| NCT03305445           | Nivolumab/ipilimumab-primed immunotransplant for DLBCL.                                                      | Relapsed refractory diffuse large B-cell lymphoma | Nivolumab plus Ipilimumab                                                | II           | Recruiting                     |
| NCT03246958           | Nivolumab plus ipilimumab in thyroid cancer.                                                                 | thyroid cancer                                    | Nivolumab plus Ipilimumab                                                | II           | Recruiting                     |
| NCT03219671           | Nivolumab and ipilimumab in classical Kaposi sarcoma (CKS).                                                  | Classic Kaposi's sarcoma                          | Nivolumab plus Ipilimumab                                                | II           | Recruiting                     |
| NCT03172624           | Study of nivolumab plus ipilimumab in patients with salivary gland cancer.                                   | Salivary gland cancer                             | Nivolumab plus Ipilimumab                                                | II           | Recruiting                     |
| NCT03510871           | Nivolumab plus ipilimumab as neoadjuvant therapy for hepatocellular carcinoma (HCC).                         | Hepatocellular carcinoma (HCC)                    | Nivolumab plus Ipilimumab                                                | II           | Not yet recruiting             |
| NCT04090710           | SBRT with combination ipilimumab/nivolumab for metastatic kidney cancer.                                     | Metastatic renal cell carcinoma                   | Drug: Ipilimumab plus Nivolumab<br>Radiation: SBRT+ Ipilimumab/Nivolumab | II           | Recruiting                     |
| NCT0391               | Durvalumab and                                                                                               | Somatically                                       | Durvalumab plus                                                          | II           | Recruiting                     |

|      |                                                                           |                     |                                     |              |
|------|---------------------------------------------------------------------------|---------------------|-------------------------------------|--------------|
| 1557 | tremelimumab combination somatically hypermutated recurrent solid tumors. | in recurrent tumors | hypermutated recurrent solid tumors | Tremelimumab |
|------|---------------------------------------------------------------------------|---------------------|-------------------------------------|--------------|

Source: clinicaltrials.gov.

**Table S2:** Clinical trials of tumor vaccines combined with other immunotherapies.

| <b>NCT identifier</b> | <b>Brief title</b>                                                                                                                  | <b>Condition</b>                | <b>Intervention</b>                                                                      | <b>Phase</b> | <b>Status as of March 2020</b> |
|-----------------------|-------------------------------------------------------------------------------------------------------------------------------------|---------------------------------|------------------------------------------------------------------------------------------|--------------|--------------------------------|
| <b>NCT03121677</b>    | Personalized tumor vaccine (PCVs) strategy and PD-1 blockade in patients with follicular lymphoma.                                  | Follicular lymphoma             | Biological: Personalized tumor vaccine<br>Biological: Nivolumab<br>Biological: Rituximab | I            | Recruiting                     |
| <b>NCT03525652</b>    | Therapeutic vaccine plus PD-1 knockout in PCa treatment.                                                                            | PCa                             | Biological: Therapeutic vaccine<br>Biological: PD-1 Knockout T Cells                     | I/II         | Recruiting                     |
| <b>NCT04161755</b>    | Study of PCVs and a PD-L1 blocker in patients with pancreatic cancer That can be treated with surgery.                              | Pancreatic cancer               | Drug: Atezolizumab<br>Biological: RO7198457<br>Drug: mFOLFIRINOX                         | I            | Recruiting                     |
| <b>NCT03897881</b>    | An efficacy study of adjuvant treatment with the PCV mRNA-4157 and pembrolizumab in patients with high-risk melanoma (KEYNOTE-942). | Melanoma                        | Biological: mRNA-4157<br>Biological: Pembrolizumab                                       | II           | Recruiting                     |
| <b>NCT04201873</b>    | Pembrolizumab and a vaccine (ATL-DC) for the treatment of surgically accessible recurrent glioblastoma.                             | Recurrent glioblastoma          | Biological: Dendritic Cell Tumor Cell Lysate Vaccine<br>Biological: Pembrolizumab        | I            | Recruiting                     |
| <b>NCT04096911</b>    | Combination of PD-1 monoclonal antibody and HPV vaccine in patients with cervical cancer.                                           | Cervical cancer                 | Drug: Sintilimab<br>Drug: quadrivalent HPV vaccine                                       | II           | Recruiting                     |
| <b>NCT04117087</b>    | Pooled mutant KRAS-targeted long peptide vaccine combined with nivolumab                                                            | Colorectal cancer<br>Pancreatic | Drug: KRAS peptide vaccine<br>Drug: Nivolumab plus Ipilimumab                            | I            | Not yet recruiting             |

---

|                    |                                                                                                                   |               |                                                           |      |                |     |
|--------------------|-------------------------------------------------------------------------------------------------------------------|---------------|-----------------------------------------------------------|------|----------------|-----|
|                    | and ipilimumab for patients with resected MMR-p colorectal and pancreatic cancer.                                 | cancer        |                                                           |      |                |     |
| <b>NCT04246671</b> | Phase 1/2 trial of intravenous TAEK-VAC-HerBy vaccine alone and in combination treatment in HER2 cancer patients. | Breast cancer | Biological: TAEK-VAC-HerBy<br>Biological: HER2 antibodies | I/II | Not recruiting | yet |

---

Source: [clinicaltrials.gov](https://clinicaltrials.gov).
